# Supplementary material
Source: PubMed Central journal article supplement (PMC5811336)
Supplement: NIHMS917372-supplement.pdf [file NIHMS917372-supplement.pdf]

## Supplementary Information

Supplementary Figure S1, and Supplementary Table S1.

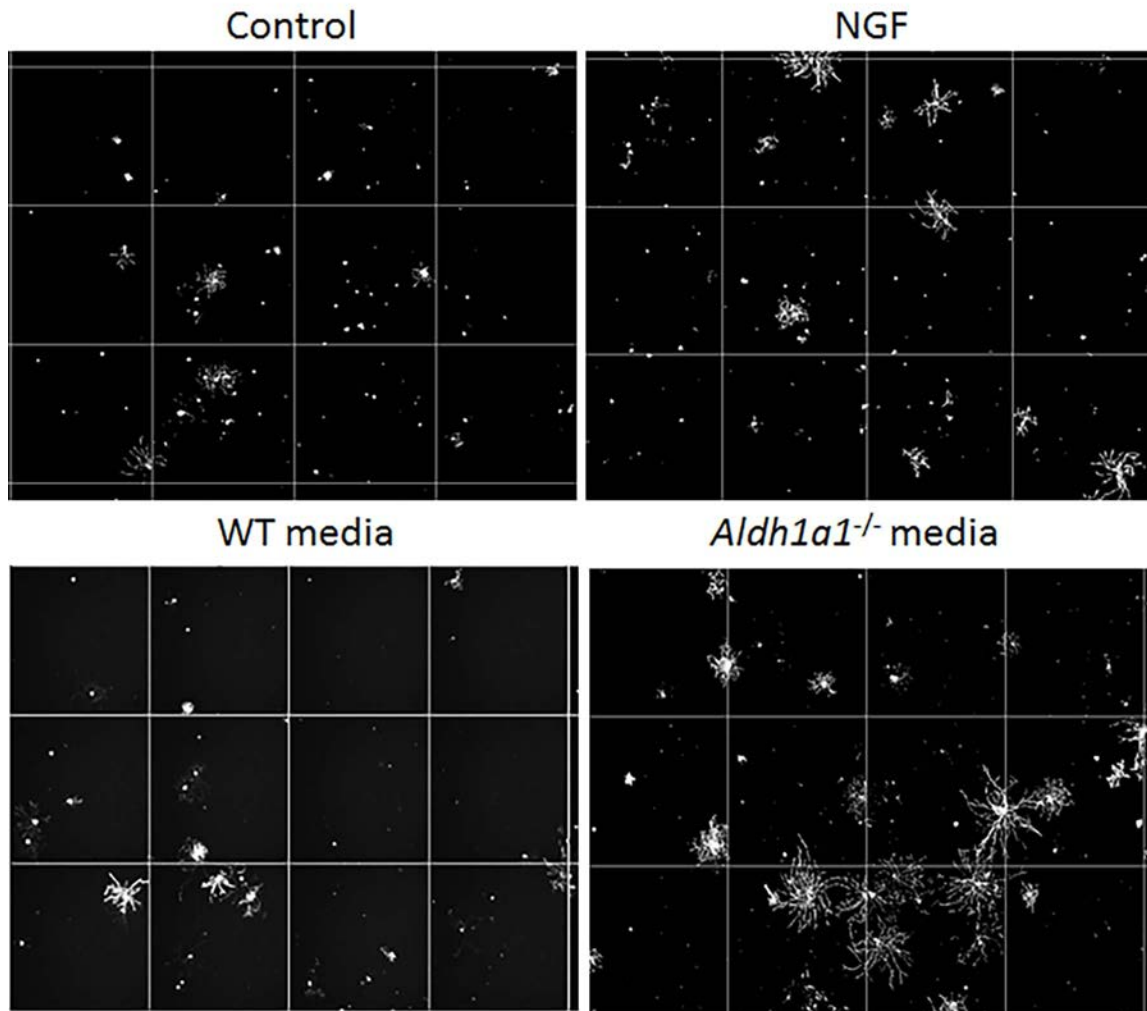

**Figure S1**

### **Medium of *Aldh1a1*<sup>-/-</sup> thermocytes induces innervation**

DRG neurons (500 neurons per well) were cultured in DRG culture medium only or in DRG culture medium with NT-3 (1 ng/mL), with NGF (10ng/mL), with WT secretome (1/1, v/v), or with *Aldh1a1*<sup>-/-</sup> secretome (1/1, v/v) for 24 hours. WT and *Aldh1a1*<sup>-/-</sup> adipocytes differentiated for 5 days. 'Secretome' refers to media collected from these cells for 24h. Representative images show ~25% of area used for the automatic quantification of neuronal parameters in Figure 2 per one condition using a Thermo

Scientific™ ArrayScan™ XTI Live High Content microscope. Nine independent experiments were performed using DRG from three mice. Each DRG batch was analyzed in triplicate. Data are shown as mean  $\pm$  SD obtained with one DRG batch. Asterisks indicate  $P < 0.05$  between different groups; Mann-Whitney U test. An image in Figure 2A shows an enlarged single square image that was randomly selected as a representative image from  $n=9$ .

**Table S1. Body weight and adipose tissue weights in mice from animal studies 1-3**

**Study 1. WT and *Aldh1a1*<sup>-/-</sup> (A1KO) mice on a high-fat (HF) diet**

| Study group (N=19) | Body Wt. (g) |                           | Sub Fat (g) |            | iAb Fat (g) |                          | Brown Fat (g) |                        |
|--------------------|--------------|---------------------------|-------------|------------|-------------|--------------------------|---------------|------------------------|
|                    | M            | F                         | M           | F          | M           | F                        | M             | F                      |
| WT (n=5m, 5f)      | 52.76±3.68   | 40.43±3.51 <sup>#</sup>   | 2.85±0.58   | 3.22±0.85  | 1.75±0.12   | 2.84±0.91                | 0.35±0.07     | 0.15±0.04 <sup>#</sup> |
| A1KO (n=5m, 4f)    | 28.75±1.88*  | 22.92±2.04 <sup>#**</sup> | 0.92±0.35*  | 0.55±0.13* | 1.23±0.33*  | 0.65±0.20 <sup>#**</sup> | 0.11±0.04*    | 0.09±0.02*             |

<sup>#</sup> p<0.05, Male (m) vs. female (f); \* p<0.05, WT vs. A1KO, Mann-Whitney U.

**Study 2. Comparison of WT and *Aldh1a1*<sup>-/-</sup> (A1KO) mice on a regular chow diet**

| Study group (N=39) | Body Wt. (g) |                           | Sub Fat (g) |          | iAb Fat (g) |          | Brown Fat (g) |           |
|--------------------|--------------|---------------------------|-------------|----------|-------------|----------|---------------|-----------|
|                    | M            | F                         | M           | F        | M           | F        | M             | F         |
| WT (n=12m, 9f)     | 26.22±3.23   | 21.08±3.03 <sup>#</sup>   | 0.28±0.10   | 0.33±0.2 | 0.48±0.15   | 0.38±0.2 | 0.08±0.02     | 0.07±0.03 |
| A1KO (n=10m, 8f)   | 21.93±2.10*  | 19.18±1.84 <sup>#**</sup> | 0.24±0.06   | 0.29±0.1 | 0.23±0.07*  | 0.27±0.1 | 0.17±0.26     | 0.07±0.03 |

<sup>#</sup> p<0.05, Male vs. Female; \* p<0.05, WT vs. A1KO, Mann-Whitney U test

**Proof-of-concept Study 3. WT mice on a high-fat (HF) diet treated with encapsulated WT and *Aldh1a1*<sup>-/-</sup> (A1KO) cells**

| Study group<br>Host:(N=18f, f)<br>Injected with: | Body Wt. (g)    |                   |                    | Sub Fat (g)        |                   |                    | iAb Fat (g)     |                   |                    |
|--------------------------------------------------|-----------------|-------------------|--------------------|--------------------|-------------------|--------------------|-----------------|-------------------|--------------------|
|                                                  | WT (n=5)<br>Veh | WT (n=5)<br>encWT | WT(n=5)<br>encA1KO | WT<br>(n=5)<br>Veh | WT (n=5)<br>encWT | WT(n=5)<br>encA1KO | WT (n=5)<br>Veh | WT (n=5)<br>encWT | WT(n=5)<br>encA1KO |
| WT                                               | 41.0±4.8        | 38.5±7.8          | 37.0±6.3           | 2.7±0.9            | 2.0±0.8           | 2.3±0.6            | 4.1±1.0         | 4.6±1.7           | 4.1±1.2            |

n.s. within groups (Veh, encWT, and encA1KO).J, n=18 includes Veh,encWT, encA1KO groups (n=5/group) and mice injected with empty capsules (n=3).
